# Supplementary material
Source: Springer Nature journal article supplement (https://www.springermedizin.de/resource/supplementary/12967_2011_966_MOESM5_ESM.pdf/9577188)

**a**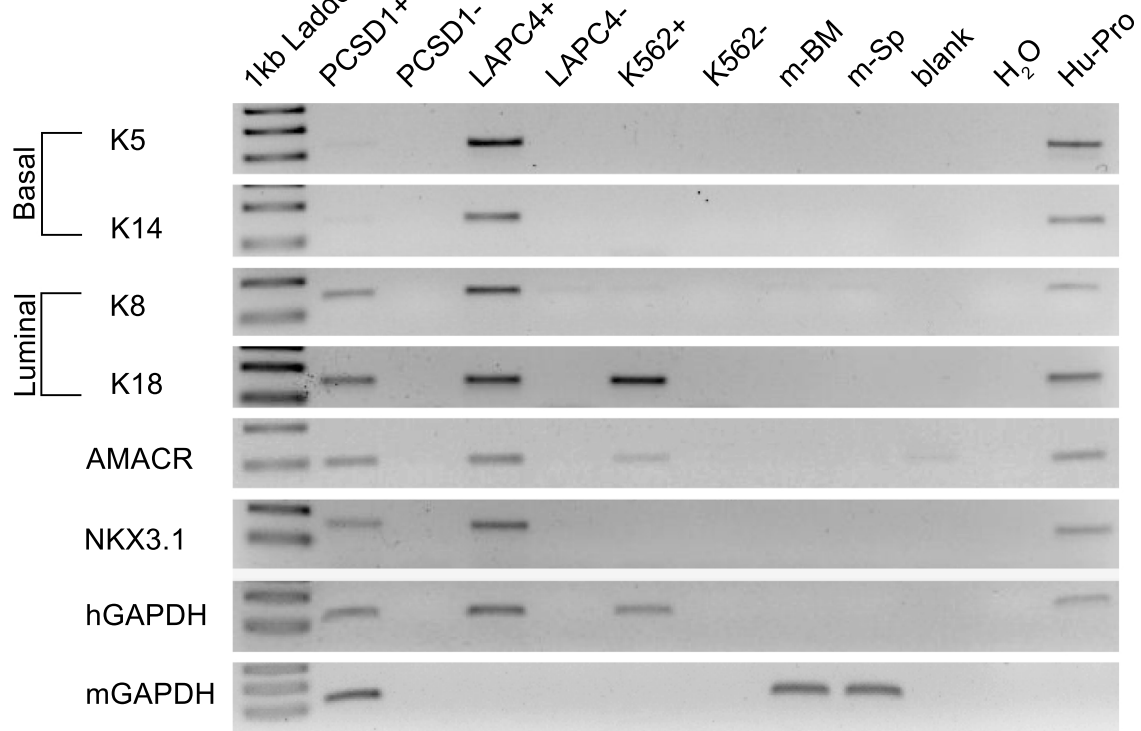**b**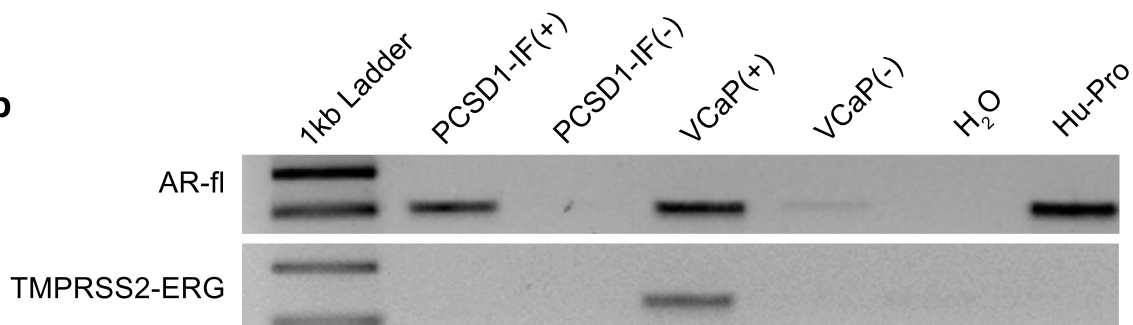

Supplement: MOESM5 [file 9577188]
